# Supplementary material for: Atomic level design of single iron atom embedded mesoporous hollow carbon spheres as multi-effect nanoreactors for advanced lithium–sulfur batteries
Source: Royal Society of Chemistry journal article supplement (doi:10.1039/d0ta07010f), 2020-01-01
Supplement: d0ta07010f1.pdf [file d0ta07010f1.pdf]

## Supporting Information

### Atomic Level Design of Single Iron Atom Embedded Mesoporous Hollow Carbon Spheres as Multi-effect Nanoreactors for Advanced Lithium- Sulfur Batteries

*Qinjun Shao, Lei Xu, Decai Guo, Yan Su\* and Jian Chen\**

<sup>a</sup> Advanced Rechargeable Battery Laboratory, Dalian National Laboratory for Clean Energy, Dalian Institute of Chemical Physics, Chinese Academy of Sciences, 457 Zhongshan Road, Dalian 116023, China

<sup>b</sup> University of Chinese Academy of Sciences, Beijing 100049, China

<sup>c</sup> Key Laboratory of Materials Modification by Laser, Ion and Electron Beams (Ministry of Education), Dalian University of Technology, Dalian, 116024, China.

\* Corresponding author. Email address: chenjian@dicp.ac.cn;

Email address: su.yan@dlut.edu.cn.

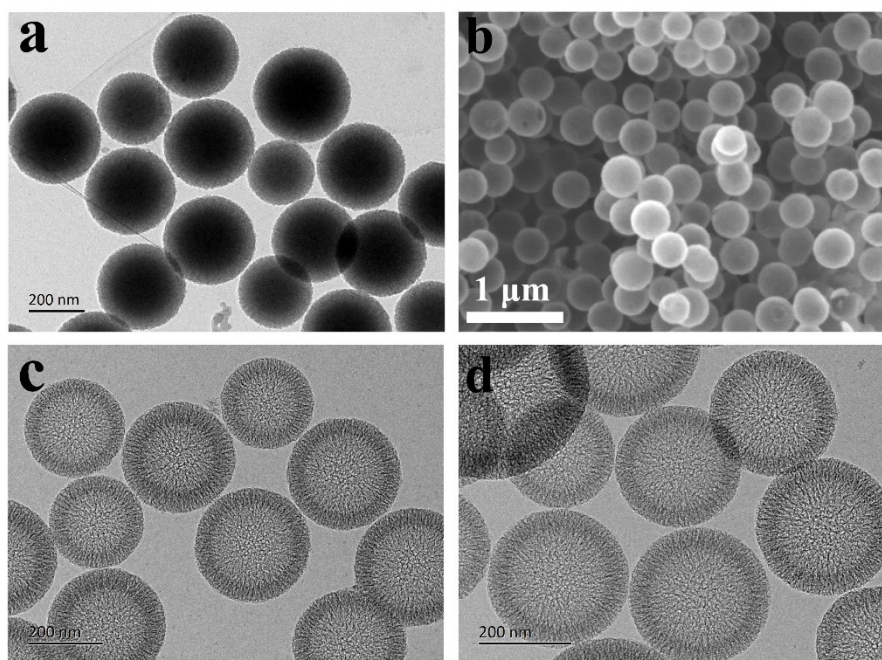

**Figure S1.** (a) TEM image of the SiO<sub>2</sub>@C spheres; (b) SEM and (c) TEM images of MHCS. (d) TEM image of N/MHCS.

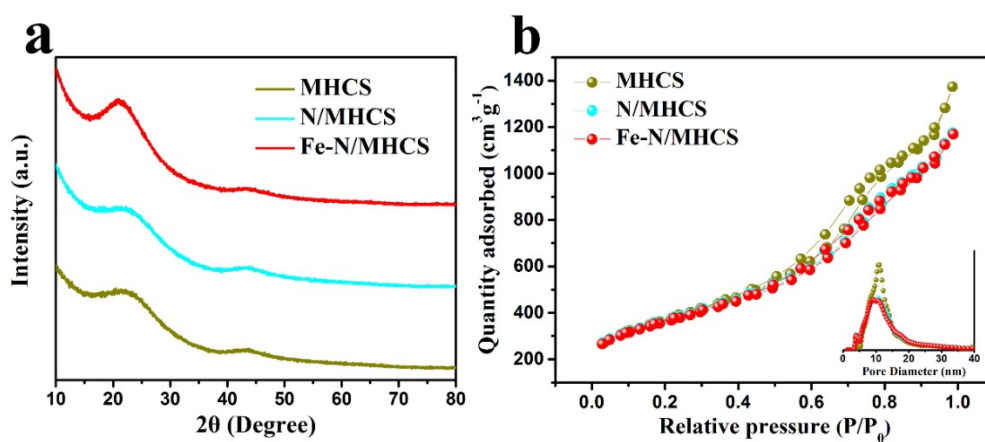

**Figure S2.** (a) XRD patterns and (b) N<sub>2</sub> adsorption-desorption isotherms of MHCS, N/MHCS and Fe-N/MHCS.

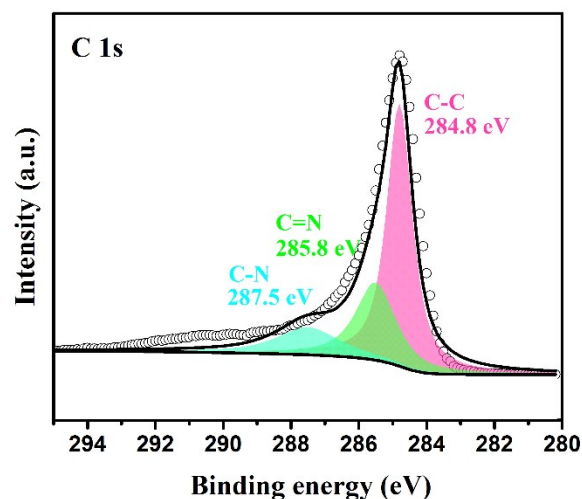

**Figure S3.** C 1s XPS spectrum of Fe-N/MHCS.

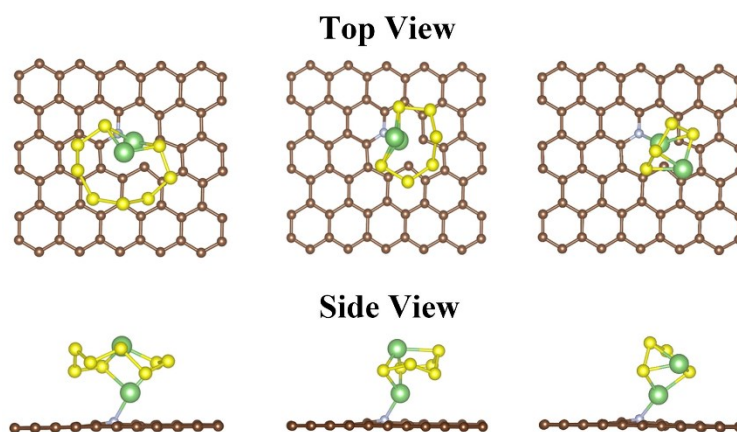

**Figure S4.** The strongest adsorption energy configurations of polysulfides on N-C substrate.

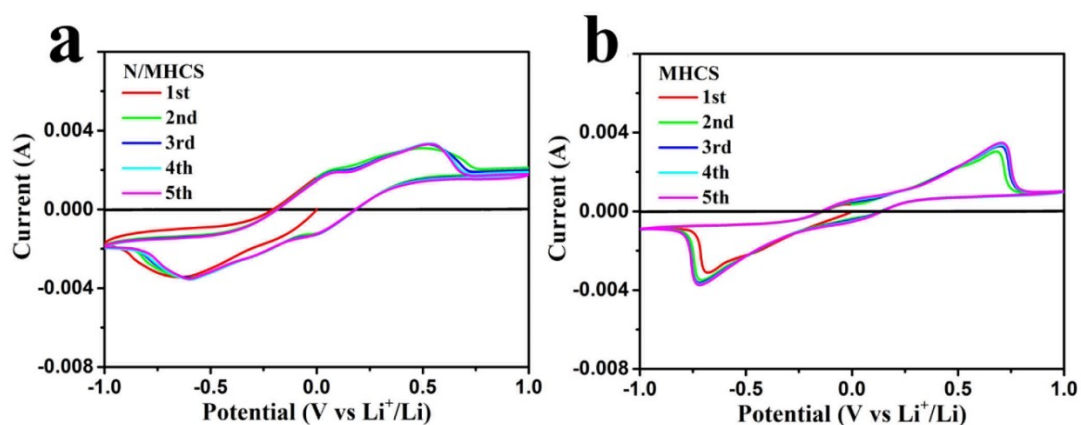

**Figure S5.** CV curves of (a) N/MHCS and (b) MHCS symmetric cells in  $0.5 \text{ mol L}^{-1} \text{ Li}_2\text{S}_6$  electrolyte at  $1 \text{ mV s}^{-1}$ .

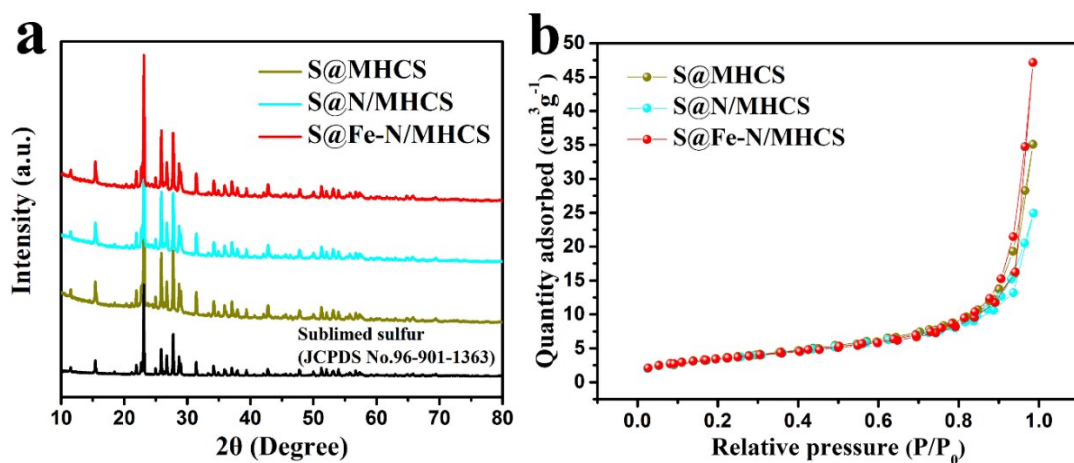

**Figure S6.** (a) XRD patterns and (b) N<sub>2</sub> adsorption-desorption isotherms of S@MHCS, S@N/MHCS and S@Fe-N/MHCS.

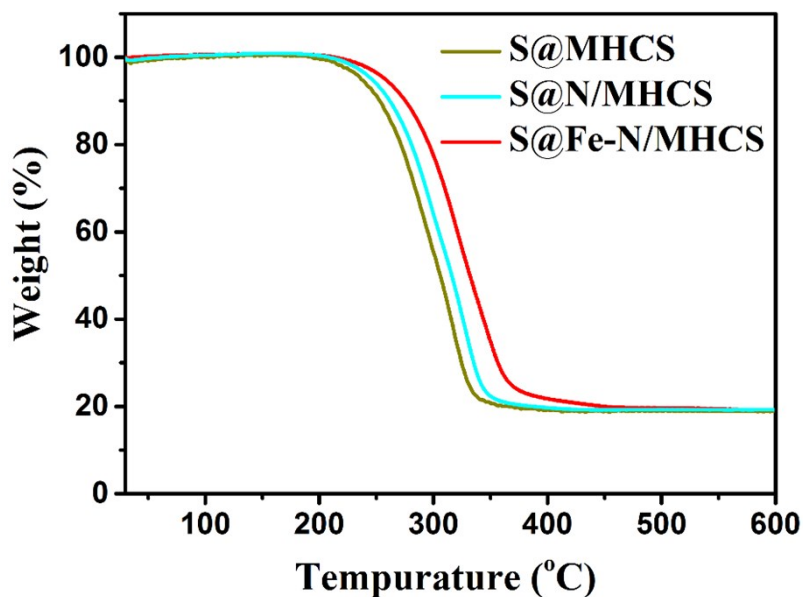

**Figure S7.** TGA curves of S@MHCS, S@N/MHCS and S@Fe-N/MHCS in Ar atmosphere.

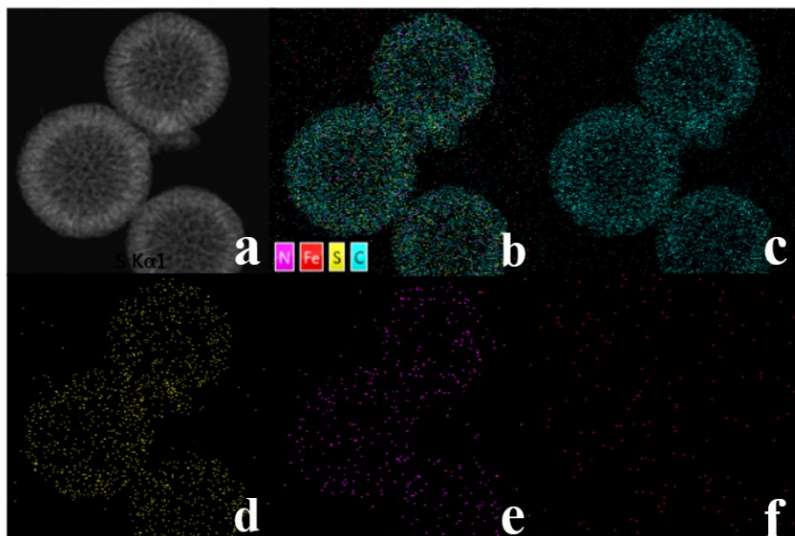

**Figure. S8** (a) STEM image of S@Fe-N/MHCS. (b) EDX elemental mapping of (c) carbon (blue), (d) sulfur (yellow), (e) nitrogen (purple) and (f) iron (red).

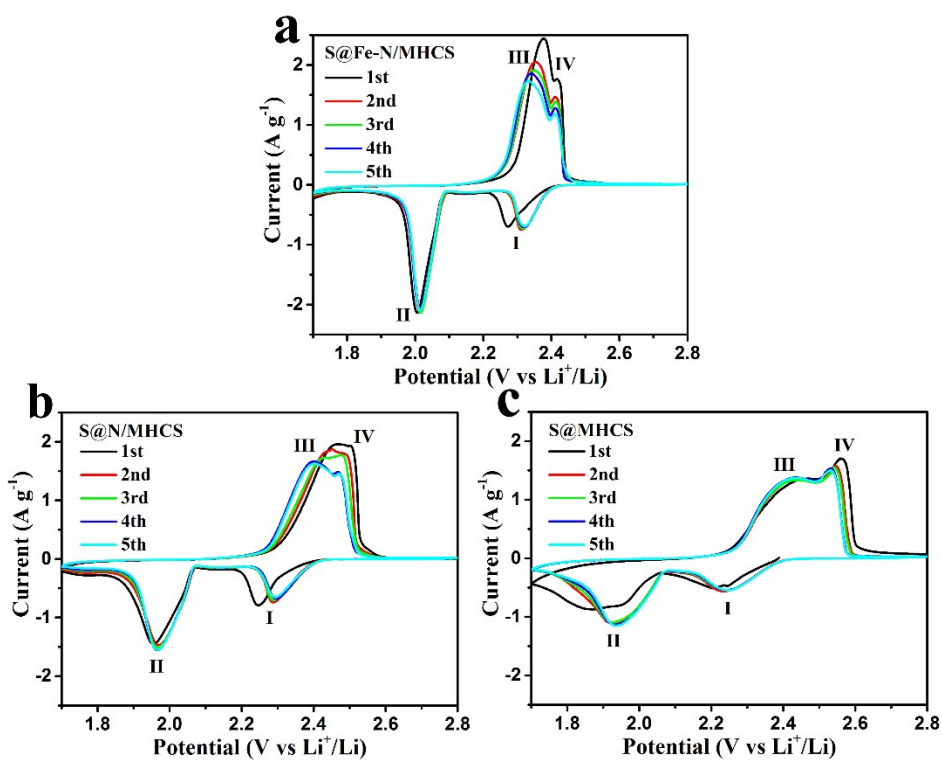

**Figure. S9** CV curves of (a) S@Fe-N/MHCS (b) S@N/MHCS and (c) S@MHCS cells at 0.1 mV s<sup>-1</sup>.

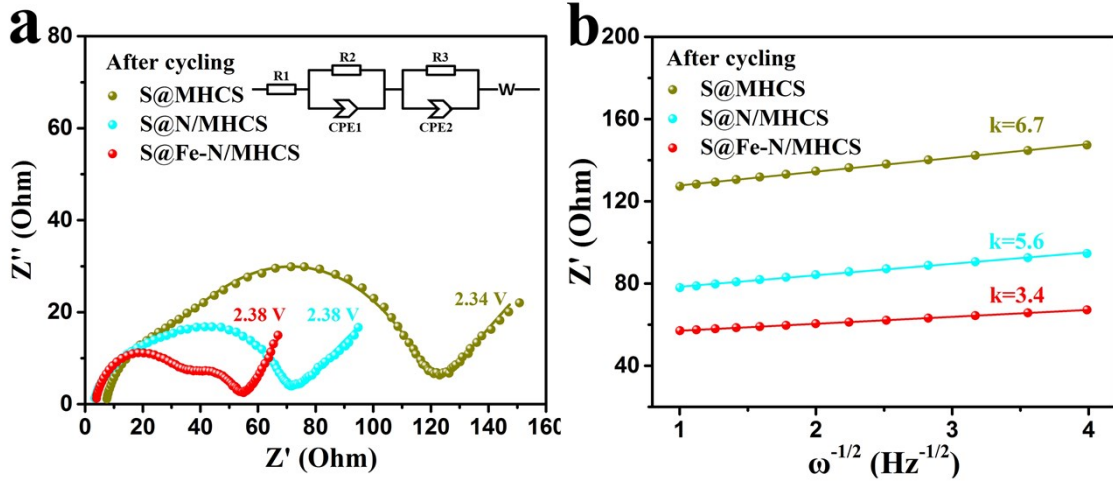

**Figure. S10** (a) EIS curves and (b) the relationship between  $Z'$  and  $\omega^{-1/2}$  of the three cells with frequency range between 1 and 0.01 Hz after cycling (symbols, real data; lines, fitting curves).

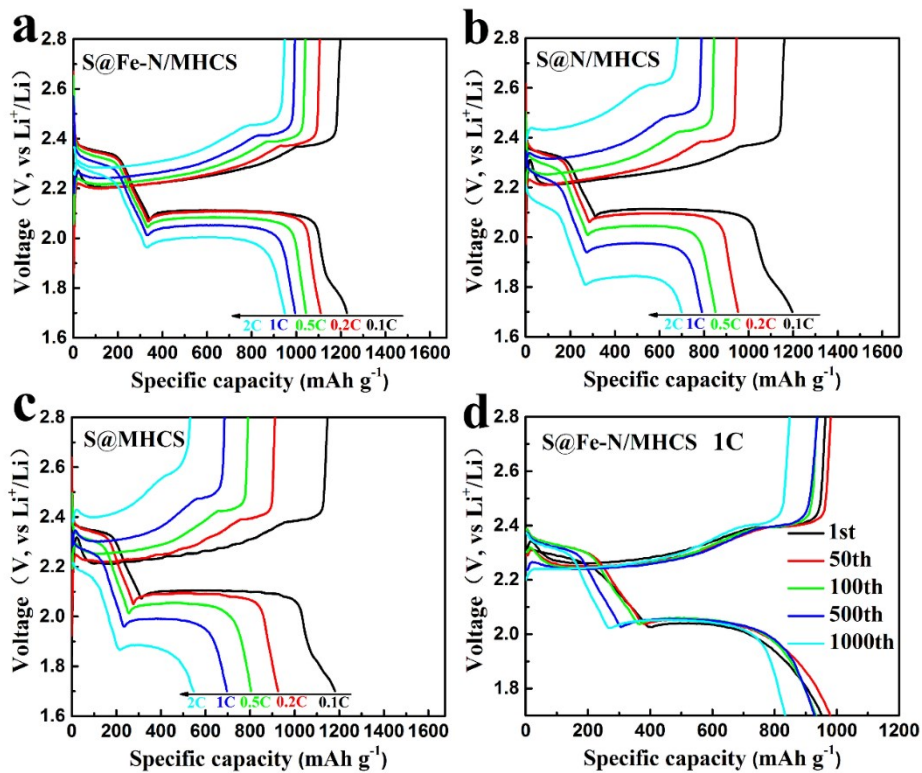

**Figure. S11** The charge-discharge profiles of (a) S@Fe-N/MHCS (b) S@N/MHCS and (c) S@MHCS cells at different rate. (d) the charge-discharge profiles of S@Fe-N/MHCS cell at 1 C rate.

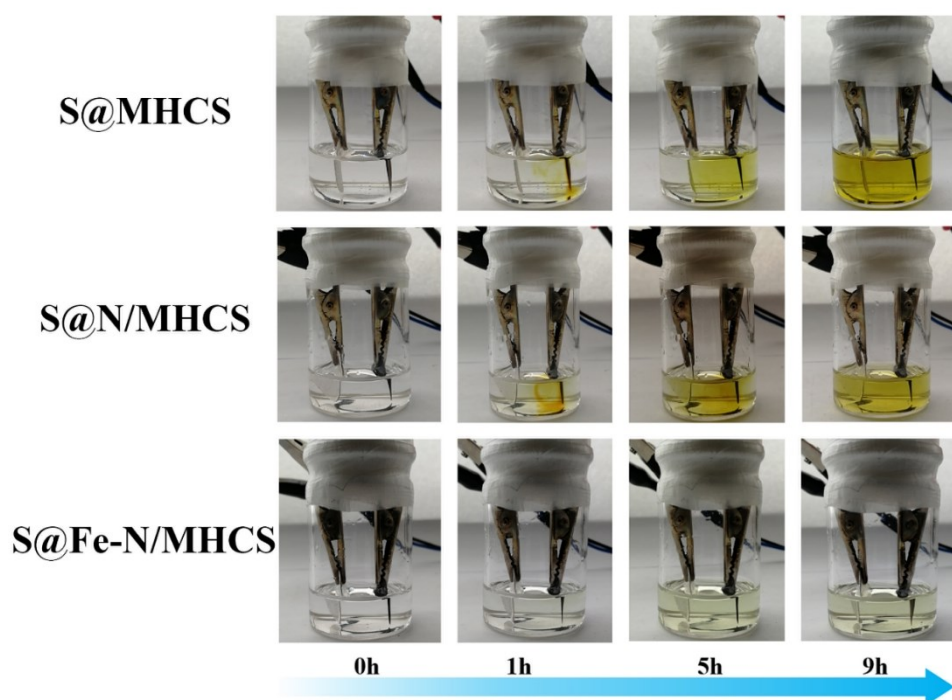

**Figure S12.** Optical photographs of the visible Li-S electrochemical cells using S@MHCS, S@N/MHCS and S@Fe-N/MHCS as cathodes throughout galvanostatic discharge at 0.1 C for 0, 1, 5 and 9 hours.

**Table S1**

The fitted Mössbauer parameters and the corresponding assignment to Fe-N/MHCS

| Components | $\delta_{\text{iso}}/\text{mm s}^{-1}$ | $\Delta E_{\text{Q}}/\text{mm s}^{-1}$ | $\text{LW}/\text{mm s}^{-1}$ | Area/% | Assignment                                        |
|------------|----------------------------------------|----------------------------------------|------------------------------|--------|---------------------------------------------------|
| D1         | 0.30560                                | 1.04509                                | 0.60406                      | 43.73  | Fe <sup>II</sup> N <sub>4</sub> -C, low spin      |
| D2         | 0.59299                                | 2.79304                                | 1.10873                      | 36.13  | Fe <sup>II</sup> N <sub>2+2</sub> -C, medium spin |
| D3         | 0.51069                                | 1.40928                                | 0.58209                      | 20.14  | N-Fe <sup>II</sup> N <sub>2+2</sub> -C, high spin |

**Table S2.** EIS fitting results of S@MHCS, S@N/MHCS and S@Fe-N/MHCS cells before/after cycling

| Elements                              | before cycling        |                       |                       | after cycling        |                      |                      |
|---------------------------------------|-----------------------|-----------------------|-----------------------|----------------------|----------------------|----------------------|
|                                       | S@MHCS                | S@N/MH<br>CS          | S@Fe-<br>N/MHCS       | S@MHCS               | S@N/MH<br>CS         | S@Fe-<br>N/MHCS      |
| $R_e / \text{Ohm}$                    | 1.8                   | 3.1                   | 1.8                   | 7.0                  | 2.8                  | 3.4                  |
| $R_{SEI} / \text{Ohm}$                | 10.6                  | 4.7                   | 5.9                   | 18.5                 | 15.4                 | 24.8                 |
| $R_{ct} / \text{Ohm}$                 | <b>95.8</b>           | <b>80.2</b>           | <b>61.0</b>           | <b>93.2</b>          | <b>50.4</b>          | <b>26.4</b>          |
| $D_{Li^+}/\text{cm}^2 \text{ s}^{-1}$ | $1.5 \times 10^{-10}$ | $2.2 \times 10^{-10}$ | $3.9 \times 10^{-10}$ | $1.3 \times 10^{-9}$ | $1.8 \times 10^{-9}$ | $5.0 \times 10^{-9}$ |

The ion diffusion coefficient can be calculated based on the following equation:

$$D = 0.5(RT/An^2F^2C\sigma)^2 \quad (1)$$

( $D$ : diffusion coefficient,  $\text{cm}^2 \cdot \text{s}^{-1}$ ;  $R$ : gas constant,  $\text{J mol}^{-1} \text{K}^{-1}$ ;  $T$ : absolute temperature,  $\text{K}$ ;  $A$ : surface area of the anode,  $\text{cm}^2$ ;  $n$ : the charge number of  $\text{Li}^+$ ;  $F$ : Faraday constant,  $\text{C mol}^{-1}$ ;  $C$ : the concentration of  $\text{Li}^+$ ,  $\text{mol L}^{-1}$ ;  $\sigma$ : the Warburg factor.)

The slope of the lines in Fig. 5d corresponding to the values of  $\sigma$  which can be obtained according to the following equation:

$$Z_{re} = R_e + R_{SEI} + R_{ct} + \sigma\omega^{-1/2} \quad (2)$$



**Table S3.** Comparison of the cycling performance of previously reported single atom embedded sulfur cathodes in coin cell with similar E/S ratio.

| Electrodes                | S loading<br>(mg cm <sup>-2</sup> ) | Rate (C) | Cycles      | Capacity<br>(mAh g <sup>-1</sup> ) | Capacity<br>decay (%) | Ref.                 |
|---------------------------|-------------------------------------|----------|-------------|------------------------------------|-----------------------|----------------------|
| S/Co-N-C                  | 1.0                                 | 0.5      | 300         | 850                                | 0.10                  | 1                    |
| S@Co-N/G                  | 2.0                                 | 1        | 500         | 681                                | 0.053                 | 2                    |
| SC-Co                     | 1.2                                 | 0.5      | 300         | 837                                | 0.086                 | 3                    |
| CoSA-N-C@S                | 1.2                                 | 1        | 1000        | 675                                | 0.035                 | 4                    |
| S@Co-SAs@NC               | 2.0                                 | 1        | 600         | 737                                | 0.067                 | 5                    |
| Fe-PNC/S                  | 1.3                                 | 0.5      | 300         | 557                                | 0.2                   | 6                    |
| FeSA-CN/S                 | 1.4                                 | 4        | 500         | 403                                | 0.06                  | 7                    |
| Li <sub>2</sub> S@NC-SAFE | 1.5                                 | 2        | 1000        | 490                                | 0.04                  | 8                    |
| Fe/Co-N@C/S               | 1.5                                 | 2        | 1000        | 565                                | 0.029                 | 9                    |
| S-SAV@NG                  | 2                                   | 0.5      | 400         | 551                                | 0.073                 | 10                   |
| S@SA-Zn-<br>MXene         | ~                                   | 1        | 400         | 706                                | 0.03                  | 11                   |
| <b>S@Fe-N/MHCS</b>        | <b>1.5</b>                          | <b>1</b> | <b>1000</b> | <b>834</b>                         | <b>0.0187</b>         | <b>This<br/>work</b> |

## References

1. B. Q. Li, L. Kong, C. X. Zhao, Q. Jin, X. Chen, H. J. Peng, J. L. Qin, J. X. Chen, H. Yuan, Q. Zhang and J. Q. Huang, *InfoMat*, 2019, **1**, 533-541.
2. Z. Du, X. Chen, W. Hu, C. Chuang, S. Xie, A. Hu, W. Yan, X. Kong, X. Wu, H. Ji and L. J. Wan, *J. Am. Chem. Soc.*, 2019, **141**, 3977-3985.
3. J. Xie, B. Q. Li, H. J. Peng, Y. W. Song, M. Zhao, X. Chen, Q. Zhang and J. Q.

- Huang, *Adv. Mater.*, 2019, **31**, e1903813.
4. Y. Li, J. Wu, B. Zhang, W. Wang, G. Zhang, Z. W. Seh, N. Zhang, J. Sun, L. Huang, J. Jiang, J. Zhou and Y. Sun, *Energy Storage Mater.*, 2020, **30**, 250-259.
  5. Y. Li, G. Chen, J. Mou, Y. Liu, S. Xue, T. Tan, W. Zhong, Q. Deng, T. Li, J. Hu, C. Yang, K. Huang and M. Liu, *Energy Storage Mater.*, 2020, **28**, 196-204.
  6. Z. Liu, L. Zhou, Q. Ge, R. Chen, M. Ni, W. Utetiwabo, X. Zhang and W. Yang, *ACS Appl. Mater. Interfaces*, 2018, **10**, 19311-19317.
  7. C. Wang, H. Song, C. Yu, Z. Ullah, Z. Guan, R. Chu, Y. Zhang, L. Zhao, Q. Li and L. Liu, *J. Mater. Chem. A*, 2020, **8**, 3421-3430.
  8. J. Wang, L. Jia, J. Zhong, Q. Xiao, C. Wang, K. Zang, H. Liu, H. Zheng, J. Luo, J. Yang, H. Fan, W. Duan, Y. Wu, H. Lin and Y. Zhang, *Energy Storage Mater.*, 2019, **18**, 246-252.
  9. H. Ye, J. Sun, S. Zhang, H. Lin, T. Zhang, Q. Yao and J. Y. Lee, *ACS Nano*, 2019, **13**, 14208-14216.
  10. G. Zhou, S. Zhao, T. Wang, S. Z. Yang, B. Johannessen, H. Chen, C. Liu, Y. Ye, Y. Wu, Y. Peng, C. Liu, S. P. Jiang, Q. Zhang and Y. Cui, *Nano Lett.*, 2020, **20**, 1252-1261.
  11. D. Zhang, S. Wang, R. Hu, J. Gu, Y. Cui, B. Li, W. Chen, C. Liu, J. Shang and S. Yang, *Adv. Funct. Mater.*, 2020, **30**, 2002471.
